# Supplementary material
Source: HighWire-hosted journal article supplement (https://lupus.bmj.com/content/8/1/e000488)
Supplement: inline-supplementary-material-2 [file inline-supplementary-material-2.xlsx]

## Sheet: AcuteCutaneousLupus_SLICC.EULAR
Criteria	In/Ex-clusion	Name	Type	Terminiology	Code	Note
Acute Cutaenous Lupus	Inclusion 1	Pemphigoid	Diagnosis	ICD9	694.5
Acute Cutaenous Lupus	Inclusion 1	Toxic epidermal necrolysis	Diagnosis	ICD9	695.15
Acute Cutaenous Lupus	Inclusion 1	Lupus erythematosus	Diagnosis	ICD9	695.4
Acute Cutaenous Lupus	Inclusion 1	Parapsoriasis	Diagnosis	ICD9	696.2
Acute Cutaenous Lupus	Inclusion 1	Acute dermatitis due to solar radiation	Diagnosis	ICD9	692.72
Acute Cutaenous Lupus	Inclusion 1	Bullous pemphigoid	Diagnosis	ICD-10-CM	L12.0
Acute Cutaenous Lupus	Inclusion 1	Other pemphigoid	Diagnosis	ICD-10-CM	L12.8
Acute Cutaenous Lupus	Inclusion 1	Pityriasis lichenoides et varioliformis acuta	Diagnosis	ICD-10-CM	L41.0
Acute Cutaenous Lupus	Inclusion 1	Pityriasis lichenoides chronica	Diagnosis	ICD-10-CM	L41.1
Acute Cutaenous Lupus	Inclusion 1	Other parapsoriasis	Diagnosis	ICD-10-CM	L41.8
Acute Cutaenous Lupus	Inclusion 1	Toxic epidermal necrolysis [Lyell]	Diagnosis	ICD-10-CM	L51.2
Acute Cutaenous Lupus	Inclusion 1	Drug phototoxic response	Diagnosis	ICD-10-CM	L56.0
Acute Cutaenous Lupus	Inclusion 1	Photocontact dermatitis [berloque dermatitis]	Diagnosis	ICD-10-CM	L56.2
Acute Cutaenous Lupus	Inclusion 1	Discoid lupus erythematosus	Diagnosis	ICD-10-CM	L93.0
Acute Cutaenous Lupus	Inclusion 1	Other local lupus erythematosus	Diagnosis	ICD-10-CM	L93.2
Acute Cutaenous Lupus	Inclusion 2	Plaquenil	Medication	Brand/Trade name	Plaquenil
Acute Cutaenous Lupus	Inclusion 2	hydrochloroquine	Medication	Generic Name	hydrochloroquine
Acute Cutaenous Lupus	Inclusion 2	Hydroxychloroquine Oral Tablet [Plaquenil]"	Medication	RXNORM	93787
Acute Cutaenous Lupus	Inclusion 2	Plaquenil	Medication	RXNORM	202462
Acute Cutaenous Lupus	Inclusion 2	Hydroxychloroquine Sulfate 200 MG [Plaquenil]	Medication	RXNORM	979093
Acute Cutaenous Lupus	Inclusion 2	Plaquenil 200 MG Oral Tablet	Medication	RXNORM	979094
Acute Cutaenous Lupus	Inclusion 2	Hydroxychloroquine Sulfate 200 MG Oral Tablet [Plaquenil]	Medication	RXNORM	979094
Acute Cutaenous Lupus	Inclusion 2	Plaquenil 200 MG Oral Tablet	Medication	RXNORM	979094
Acute Cutaenous Lupus	Inclusion 2	Plaquenil Oral Product	Medication	RXNORM	1181266
Acute Cutaenous Lupus	Inclusion 2	Plaquenil Pill	Medication	RXNORM	1181267
Acute Cutaenous Lupus	Inclusion 3	Rash and other nonspecific skin eruption	Diagnosis	ICD9	782.1
Acute Cutaenous Lupus	Inclusion 3	Rash and other nonspecific skin eruption	Diagnosis	ICD-10-CM	R21
Acute Cutaenous Lupus	Exlusion	Dermatomyositis	Diagnosis	ICD9	710.3
Acute Cutaenous Lupus	Exlusion	Dermatopolymyositis, unspecified, organ involvement unspecified	Diagnosis	ICD-10-CM	M33.90
Logic	Two or more of the codes for Inclusion 1 or (Inclusion 2 and Inclusion 3) on at least 2 separate dates.

## Sheet: Alopecia_SLICC.EULAR
Criteria	In/Ex-clusion	Name	Type	Terminiology	Code	Note
Alopecia	Inclusion	Alopecia, unspecified	Diagnosis	ICD-9	704.00
Alopecia	Inclusion	Alopecia areata	Diagnosis	ICD-9	704.01
Alopecia	Inclusion	Pseudopelade	Diagnosis	ICD-10	L66.0
Alopecia	Inclusion	Folliculitis decalvans	Diagnosis	ICD-10	L66.2
Alopecia	Inclusion	Other cicatricial alopecia	Diagnosis	ICD-10	L66.8
Alopecia	Inclusion	Vasculitis limited to the skin, unspecified	Diagnosis	ICD-10	L95.9
Alopecia	Exclusion	Other specified iron deficiency anemias	Diagnosis	ICD-9	280.8
Alopecia	Exclusion	Iron deficiency anemia, unspecified	Diagnosis	ICD-9	280.9
Alopecia	Exclusion	Other iron deficiency anemias	Diagnosis	ICD-10	D50.8
Alopecia	Exclusion	Iron deficiency anemia, unspecified	Diagnosis	ICD-10	D50.9
Logic:	One or more inclusion code in the absence of any of the exclusion codes.

## Sheet: Anti-dsDNAAbs_SLICC.EULAR
Criteria	In/Ex-clusion	Name	Type	Terminiology	Code	Operator	Value	Units	Note
Anti-dsDNA Antibodies	Inclusion	DNA double strand Ab [Titer] in Serum	Laboratory	LOINC	11013-0	>	1:10
Anti-dsDNA Antibodies	Inclusion	DNA double strand Ab [Titer] in Serum by Immunofluorescence (IF) Crithidia luciliae	Laboratory	LOINC	34187-5	>	1:10
Anti-dsDNA Antibodies	Inclusion	DNA double strand Ab [Presence] in Serum by Immunofluorescence (IF) Crithidia luciliae	Laboratory	LOINC	6457-6		positive		positive or similar
Anti-dsDNA Antibodies	Inclusion	DNA double strand Ab [Presence] in Serum by Farr method	Laboratory	LOINC	12277-0		positive		positive or similar
Anti-dsDNA Antibodies	Inclusion	DNA double strand Ab [Presence] in Serum	Laboratory	LOINC	31348-6		positive		positive or similar
Anti-dsDNA Antibodies	Inclusion	DNA double strand Ab [Presence] in Serum by Line blot	Laboratory	LOINC	81716-3		positive		positive or similar
Anti-dsDNA Antibodies	Inclusion	DNA double strand Ab [Units/volume] in Serum by Radioimmunoassay (RIA)	Laboratory	LOINC	42200-6	>	5	International Units/milliliter
Anti-dsDNA Antibodies	Inclusion	DNA double strand Ab [Units/volume] in Serum by Farr method	Laboratory	LOINC	47299-3	>	5	International Units/milliliter
Anti-dsDNA Antibodies	Inclusion	DNA double strand Ab [Units/volume] in Serum by Immunoassay	Laboratory	LOINC	32677-7	>	5	International Units/milliliter
Anti-dsDNA Antibodies	Inclusion	DNA double strand Ab [Units/volume] in Serum	Laboratory	LOINC	5130-0	>	5	International Units/milliliter
Logic	Any Inclusion

## Sheet: Anti-NuclearAbs_ALL
Criteria	In/Ex-clusion	Name	Type	Terminiology	Code	Operator	Value	Units	Note
Anti-Nuclear Antibodies	Inclusion	Nuclear Ab [Titer] in Serum	Laboratory	LOINC	29953-7	>=	1:80
Anti-Nuclear Antibodies	Inclusion	Nuclear Ab [Titer] in Serum by Hep2 substrate	Laboratory	LOINC	33253-6	>=	1:80
Anti-Nuclear Antibodies	Inclusion	Nuclear Ab [Titer] in Serum by Immunoassay	Laboratory	LOINC	40655-3	>=	1:80
Anti-Nuclear Antibodies	Inclusion	Nuclear Ab [Titer] in Serum by Immunofluorescence	Laboratory	LOINC	5048-4	>=	1:80
Anti-Nuclear Antibodies	Inclusion	Nuclear Ab [Presence] in Serum by Immunofluorescence	Laboratory	LOINC	42254-3		Positive		Positive or similar??
Anti-Nuclear Antibodies	Inclusion	Nuclear Ab [Presence] in Serum by Immunoassay	Laboratory	LOINC	47383-5		Positive		Positive or similar??
Anti-Nuclear Antibodies	Inclusion	Nuclear Ab [Presence] in Serum by Hep2 substrate	Laboratory	LOINC	59069-5		Positive		Positive or similar??
Anti-Nuclear Antibodies	Inclusion	Nuclear Ab [Presence] in Serum	Laboratory	LOINC	8061-4		Positive		Positive or similar??
Anti-Nuclear Antibodies	Inclusion	Nuclear Ab [Units/volume] in Serum by Immunoassay	Laboratory	LOINC	5047-6	>=	8	International Units/Liter
Anti-Nuclear Antibodies	Inclusion	Nuclear Ab [Units/volume] in Serum by Immunofluorescence	Laboratory	LOINC	9423-5	>=	8	International Units/Liter
Logic	Any Inclusion

## Sheet: Anti-PhospholipidAb_SLICC.EULAR
Criteria	In/Ex-clusion	Name	Type	Terminiology	Code	Operator	Value	Units	Note
Anti-Phospholipid Antibodies	Inclusion 1	Cardiolipin IgG Ab [Units/volume] in Serum by Immunoassay	Laboratory	LOINC	3181-5	>	20	G/MPL	GPL(IgG) or MPL(IgM)
Anti-Phospholipid Antibodies	Inclusion 1	Cardiolipin IgM Ab [Units/volume] in Serum by Immunoassay	Laboratory	LOINC	3182-3	>	20	G/MPL	GPL(IgG) or MPL(IgM)
Anti-Phospholipid Antibodies	Inclusion 1	Cardiolipin IgG Ab [Units/volume] in Serum or Plasma	Laboratory	LOINC	8065-5	>	20	G/MPL	GPL(IgG) or MPL(IgM)
Anti-Phospholipid Antibodies	Inclusion 1	Cardiolipin IgM Ab [Units/volume] in Serum or Plasma	Laboratory	LOINC	8067-1	>	20	G/MPL	GPL(IgG) or MPL(IgM)
Anti-Phospholipid Antibodies	Inclusion 1	Cardiolipin IgM Ab [Mass/volume] in Serum	Laboratory	LOINC	43363-1	>	20	G/MPL	GPL(IgG) or MPL(IgM)
Anti-Phospholipid Antibodies	Inclusion 1	Deprecated Cardiolipin IgM Ab in Serum	Laboratory	LOINC	55445-1	>	20	G/MPL	GPL(IgG) or MPL(IgM)
Anti-Phospholipid Antibodies	Inclusion 1	Cardiolipin Ab [Units/volume] in Serum by Immunoassay	Laboratory	LOINC	3180-7	>	20	G/MPL	GPL(IgG) or MPL(IgM)
Anti-Phospholipid Antibodies	Inclusion 1	Deprecated Cardiolipin Ab in Serum	Laboratory	LOINC	55443-6	>	20	G/MPL	GPL(IgG) or MPL(IgM)
Anti-Phospholipid Antibodies	Inclusion 1	Cardiolipin Ab [Units/volume] in Serum	Laboratory	LOINC	8062-2	>	20	G/MPL	GPL(IgG) or MPL(IgM)
Anti-Phospholipid Antibodies	Inclusion 1	Cardiolipin IgG Ab [Mass/volume] in Serum	Laboratory	LOINC	43362-3	>	20	G/MPL	GPL(IgG) or MPL(IgM)
Anti-Phospholipid Antibodies	Inclusion 1	Deprecated Cardiolipin IgG Ab in Serum	Laboratory	LOINC	55446-9	>	20	G/MPL	GPL(IgG) or MPL(IgM)
Anti-Phospholipid Antibodies	Inclusion 1	Lupus anticoagulant three screening tests W Reflex [interpretation]	Laboratory	LOINC	75882-1		Positive		Positive or similar
Anti-Phospholipid Antibodies	Inclusion 1	Beta 2 glycoprotein 1 IgA Ab [Units/volume] in Serum	Laboratory	LOINC	21108-6	>	20	Units/milliliter
Anti-Phospholipid Antibodies	Inclusion 1	Beta 2 glycoprotein 1 Ab [Units/volume] in Serum	Laboratory	LOINC	40456-6	>	20	Units/milliliter
Anti-Phospholipid Antibodies	Inclusion 1	Beta 2 glycoprotein 1 IgG Ab [Units/volume] in Serum or Plasma by Immunoassay	Laboratory	LOINC	44448-9	>	20	Units/milliliter
Anti-Phospholipid Antibodies	Inclusion 1	Beta 2 glycoprotein 1 IgM Ab [Units/volume] in Serum or Plasma by Immunoassay	Laboratory	LOINC	44449-7	>	20	Units/milliliter
Anti-Phospholipid Antibodies	Inclusion 1	Beta 2 glycoprotein 1 IgG Ab [Units/volume] in Serum	Laboratory	LOINC	16135-6	>	20	Units/milliliter
Anti-Phospholipid Antibodies	Inclusion 1	Beta 2 glycoprotein 1 IgM Ab [Units/volume] in Serum	Laboratory	LOINC	16136-4	>	20	Units/milliliter
Anti-Phospholipid Antibodies	Inclusion 1	Beta 2 glycoprotein 1 IgA Ab [Units/volume] in Serum or Plasma by Immunoassay	Laboratory	LOINC	44447-1	>	20	Units/milliliter
Anti-Phospholipid Antibodies	Inclusion 1	Beta 2 glycoprotein 1 Ab [Units/volume] in Serum by Immunoassay	Laboratory	LOINC	56538-2	>	20	Units/milliliter
Anti-Phospholipid Antibodies	Inclusion 1	Beta 2 glycoprotein 1 IgG and IgM panel - Serum	Laboratory	LOINC	72488-0	>	20	Units/milliliter
Anti-Phospholipid Antibodies	Inclusion 1	Beta 2 glycoprotein 1 [Mass/volume] in Serum or Plasma	Laboratory	LOINC	1880-4	>	20	Units/milliliter
Anti-Phospholipid Antibodies	Inclusion 2	Reagin Ab [Presence] in Serum by RPR	Laboratory	LOINC	20507-0		Reactive		Reactive or similar
Anti-Phospholipid Antibodies	Inclusion 2	Reagin Ab [Presence] in Serum by VDRL	Laboratory	LOINC	5292-8		Reactive		Reactive or similar
Anti-Phospholipid Antibodies	Inclusion 3	Treponema pallidum Ab [Presence] in Serum by Immunofluorescence	Laboratory	LOINC	5393-4		Negative
Logic	Inclusion 1 OR (Inclusion 2 AND Inclusion 3)

## Sheet: Anti-SmithAbs_SLICC.EULAR
Criteria	In/Ex-clusion	Name	Type	Terminiology	Code	Operator	Value	Units	Note
Anti-Sm Antibodies	Inclusion	Smith extractable nuclear Ab [Titer] in Serum by Immune diffusion (ID)	Laboratory	LOINC	17589-3	>=	1:80
Anti-Sm Antibodies	Inclusion	Smith extractable nuclear Ab [Titer] in Serum by Immunoassay	Laboratory	LOINC	17590-1	>=	1:80
Anti-Sm Antibodies	Inclusion	Smith extractable nuclear Ab [Titer] in Serum	Laboratory	LOINC	9722-0	>=	1:80
Anti-Sm Antibodies	Inclusion	Smith extractable nuclear Ab [Presence] in Serum by Immunofluorescence	Laboratory	LOINC	17591-9		Positive		Positive or similar
Anti-Sm Antibodies	Inclusion	Smith extractable nuclear Ab [Presence] in Serum	Laboratory	LOINC	31627-3		Positive		Positive or similar
Anti-Sm Antibodies	Inclusion	Smith extractable nuclear Ab [Presence] in Serum by Counterimmunoelectrophoresis (CIE)	Laboratory	LOINC	5355-3		Positive		Positive or similar
Anti-Sm Antibodies	Inclusion	Smith extractable nuclear Ab [Presence] in Serum by Immunoassay	Laboratory	LOINC	5356-1		Positive		Positive or similar
Anti-Sm Antibodies	Inclusion	Smith extractable nuclear Ab [Presence] in Serum by Immune diffusion (ID)	Laboratory	LOINC	5357-9		Positive		Positive or similar
Anti-Sm Antibodies	Inclusion	Smith extractable nuclear Ab [Presence] in Serum by Immunoblot	Laboratory	LOINC	56730-5		Positive		Positive or similar
Anti-Sm Antibodies	Inclusion	Smith extractable nuclear Ab [Units/volume] in Serum by Immunofluorescence	Laboratory	LOINC	17592-7	>=	20
Anti-Sm Antibodies	Inclusion	Smith extractable nuclear Ab [Units/volume] in Serum by Immunoassay	Laboratory	LOINC	43182-5	>=	20
Anti-Sm Antibodies	Inclusion	Smith extractable nuclear Ab+Ribonucleoprotein extractable nuclear IgG Ab [Units/volume] in Serum by Immunoassay	Laboratory	LOINC	33567-9	>=	20
Anti-Sm Antibodies	Inclusion	Smith extractable nuclear Ab+Ribonucleoprotein extractable nuclear IgG Ab [Presence] in Serum	Laboratory	LOINC	33460-7	>=	20
Logic	Any Inclusion

## Sheet: Arthritis_ALL
Criteria	In/Ex-clusion	Name	Type	Terminiology	Code	Note
Arthritis	Inclusion	Transient arthropathy, site unspecified	Diagnosis	ICD-9	716.40
Arthritis	Inclusion	Transient arthropathy, other specified sites	Diagnosis	ICD-9	716.48
Arthritis	Inclusion	Unspecified polyarthropathy or polyarthritis	Diagnosis	ICD-9	716.5
Arthritis	Inclusion	Unspecified polyarthropathy or polyarthritis, site unspecified	Diagnosis	ICD-9	716.50
Arthritis	Inclusion	Unspecified polyarthropathy or polyarthritis, shoulder region	Diagnosis	ICD-9	716.51
Arthritis	Inclusion	Unspecified polyarthropathy or polyarthritis, upper arm	Diagnosis	ICD-9	716.52
Arthritis	Inclusion	Unspecified polyarthropathy or polyarthritis, forearm	Diagnosis	ICD-9	716.53
Arthritis	Inclusion	Unspecified polyarthropathy or polyarthritis, hand	Diagnosis	ICD-9	716.54
Arthritis	Inclusion	Unspecified polyarthropathy or polyarthritis, pelvic region and thigh	Diagnosis	ICD-9	716.55
Arthritis	Inclusion	Unspecified polyarthropathy or polyarthritis, lower leg	Diagnosis	ICD-9	716.56
Arthritis	Inclusion	Unspecified polyarthropathy or polyarthritis, ankle and foot	Diagnosis	ICD-9	716.57
Arthritis	Inclusion	Unspecified polyarthropathy or polyarthritis, other specified sites	Diagnosis	ICD-9	716.58
Arthritis	Inclusion	Unspecified polyarthropathy or polyarthritis, multiple sites	Diagnosis	ICD-9	716.59
Arthritis	Inclusion	Unspecified arthropathy	Diagnosis	ICD-9	716.9
Arthritis	Inclusion	Arthropathy, unspecified, site unspecified	Diagnosis	ICD-9	716.90
Arthritis	Inclusion	Arthropathy, unspecified, shoulder region	Diagnosis	ICD-9	716.91
Arthritis	Inclusion	Arthropathy, unspecified, upper arm	Diagnosis	ICD-9	716.92
Arthritis	Inclusion	Arthropathy, unspecified, forearm	Diagnosis	ICD-9	716.93
Arthritis	Inclusion	Arthropathy, unspecified, hand	Diagnosis	ICD-9	716.94
Arthritis	Inclusion	Arthropathy, unspecified, pelvic region and thigh	Diagnosis	ICD-9	716.95
Arthritis	Inclusion	Arthropathy, unspecified, lower leg	Diagnosis	ICD-9	716.96
Arthritis	Inclusion	Arthropathy, unspecified, ankle and foot	Diagnosis	ICD-9	716.97
Arthritis	Inclusion	Arthropathy, unspecified, other specified sites	Diagnosis	ICD-9	716.98
Arthritis	Inclusion	Arthropathy, unspecified, multiple sites	Diagnosis	ICD-9	716.99
Arthritis	Inclusion	Other specified arthropathy, site unspecified	Diagnosis	ICD-9	716.80
Arthritis	Inclusion	Other specified arthropathy, other specified sites	Diagnosis	ICD-9	716.88
Arthritis	Inclusion	Other specified arthropathy, multiple sites	Diagnosis	ICD-9	716.89
Arthritis	Inclusion	Effusion of joint, site unspecified	Diagnosis	ICD-9	719.00
Arthritis	Inclusion	Effusion of joint, other specified sites	Diagnosis	ICD-9	719.08
Arthritis	Inclusion	Pain in joint, multiple sites	Diagnosis	ICD-9	719.49
Arthritis	Inclusion	Other specified disorders of joint, site unspecified	Diagnosis	ICD-9	719.80
Arthritis	Inclusion	Other specified disorders of joint, other specified sites	Diagnosis	ICD-9	719.88
Arthritis	Inclusion	Other specified disorders of joint, multiple sites	Diagnosis	ICD-9	719.89
Arthritis	Inclusion	Other symptoms referable to joint	Diagnosis	ICD-9	719.6
Arthritis	Inclusion	Other symptoms referable to joint, site unspecified	Diagnosis	ICD-9	719.60
Arthritis	Inclusion	Other symptoms referable to joint, shoulder region	Diagnosis	ICD-9	719.61
Arthritis	Inclusion	Other symptoms referable to joint, upper arm	Diagnosis	ICD-9	719.62
Arthritis	Inclusion	Other symptoms referable to joint, forearm	Diagnosis	ICD-9	719.63
Arthritis	Inclusion	Other symptoms referable to joint, hand	Diagnosis	ICD-9	719.64
Arthritis	Inclusion	Other symptoms referable to joint, pelvic region and thigh	Diagnosis	ICD-9	719.65
Arthritis	Inclusion	Other symptoms referable to joint, lower leg	Diagnosis	ICD-9	719.66
Arthritis	Inclusion	Other symptoms referable to joint, ankle and foot	Diagnosis	ICD-9	719.67
Arthritis	Inclusion	Other symptoms referable to joint, other specified sites	Diagnosis	ICD-9	719.68
Arthritis	Inclusion	Other symptoms referable to joint, multiple sites	Diagnosis	ICD-9	719.69
Arthritis	Inclusion	Unspecified disorder of joint	Diagnosis	ICD-9	719.9
Arthritis	Inclusion	Unspecified disorder of joint, site unspecified	Diagnosis	ICD-9	719.90
Arthritis	Inclusion	Unspecified disorder of joint, shoulder region	Diagnosis	ICD-9	719.91
Arthritis	Inclusion	Unspecified disorder of joint, upper arm	Diagnosis	ICD-9	719.92
Arthritis	Inclusion	Unspecified disorder of joint, forearm	Diagnosis	ICD-9	719.93
Arthritis	Inclusion	Unspecified disorder of joint, hand	Diagnosis	ICD-9	719.94
Arthritis	Inclusion	Unspecified disorder of joint, pelvic region and thigh	Diagnosis	ICD-9	719.95
Arthritis	Inclusion	Unspecified disorder of joint, lower leg	Diagnosis	ICD-9	719.96
Arthritis	Inclusion	Unspecified disorder of joint, ankle and foot	Diagnosis	ICD-9	719.97
Arthritis	Inclusion	Unspecified disorder of joint, other specified sites	Diagnosis	ICD-9	719.98
Arthritis	Inclusion	Unspecified disorder of joint, multiple sites	Diagnosis	ICD-9	719.99
Arthritis	Inclusion	Personal history of arthritis	Diagnosis	ICD-9	V13.4
Arthritis	Inclusion	Other specific arthropathies, not elsewhere classified, unspecified site	Diagnosis	ICD-10	M12.80
Arthritis	Inclusion	Other specific arthropathies, not elsewhere classified, other specified site	Diagnosis	ICD-10	M12.88
Arthritis	Inclusion	Other specific arthropathies, not elsewhere classified, multiple sites	Diagnosis	ICD-10	M12.89
Arthritis	Inclusion	Polyarthritis, unspecified	Diagnosis	ICD-10	M13.0
Arthritis	Inclusion	Effusion, unspecified joint	Diagnosis	ICD-10	M25.40
Arthritis	Inclusion	Effusion, other site	Diagnosis	ICD-10	M25.48
Arthritis	Inclusion	Pain in unspecified joint	Diagnosis	ICD-10	M25.50
Arthritis	Inclusion	Joint disorder, unspecified	Diagnosis	ICD-10	M25.9
Arthritis	Exclusion	Osteoarthrosis and allied disorders	Diagnosis	ICD-9	715.*
Arthritis	Exclusion	Primary generalized (osteo)arthritis	Diagnosis	ICD-10	M15.0
Arthritis	Exclusion	Polyosteoarthritis, unspecified	Diagnosis	ICD-10	M15.9
Arthritis	Exclusion	Heberden's nodes (with arthropathy)	Diagnosis	ICD-10	M15.1
Arthritis	Exclusion	Bouchard's nodes (with arthropathy)	Diagnosis	ICD-10	M15.2
Arthritis	Exclusion	Primary osteoarthritis, unspecified site	Diagnosis	ICD-10	M19.91
Arthritis	Exclusion	Primary osteoarthritis, unspecified shoulder	Diagnosis	ICD-10	M19.019
Arthritis	Exclusion	Primary osteoarthritis, unspecified elbow	Diagnosis	ICD-10	M19.029
Arthritis	Exclusion	Primary osteoarthritis, unspecified wrist	Diagnosis	ICD-10	M19.039
Arthritis	Exclusion	Primary osteoarthritis, unspecified hand	Diagnosis	ICD-10	M19.049
Arthritis	Exclusion	Unilateral primary osteoarthritis, unspecified hip	Diagnosis	ICD-10	M16.10
Arthritis	Exclusion	Unilateral primary osteoarthritis, unspecified knee	Diagnosis	ICD-10	M17.10
Arthritis	Exclusion	Primary osteoarthritis, unspecified ankle and foot	Diagnosis	ICD-10	M19.079
Arthritis	Exclusion	Secondary osteoarthritis, unspecified site	Diagnosis	ICD-10	M19.93
Arthritis	Exclusion	Secondary osteoarthritis, unspecified shoulder	Diagnosis	ICD-10	M19.219
Arthritis	Exclusion	Secondary osteoarthritis, unspecified elbow	Diagnosis	ICD-10	M19.229
Arthritis	Exclusion	Secondary osteoarthritis, unspecified wrist	Diagnosis	ICD-10	M19.239
Arthritis	Exclusion	Secondary osteoarthritis, unspecified hand	Diagnosis	ICD-10	M19.249
Arthritis	Exclusion	Other unilateral secondary osteoarthritis of hip	Diagnosis	ICD-10	M16.7
Arthritis	Exclusion	Other unilateral secondary osteoarthritis of knee	Diagnosis	ICD-10	M17.5
Arthritis	Exclusion	Secondary osteoarthritis, unspecified ankle and foot	Diagnosis	ICD-10	M19.279
Arthritis	Exclusion	Secondary osteoarthritis, unspecified site	Diagnosis	ICD-10	M19.93
Arthritis	Exclusion	Unspecified osteoarthritis, unspecified site	Diagnosis	ICD-10	M19.90
Arthritis	Exclusion	Osteoarthritis of first carpometacarpal joint, unspecified	Diagnosis	ICD-10	M18.9
Arthritis	Exclusion	Osteoarthritis of hip, unspecified	Diagnosis	ICD-10	M16.9
Arthritis	Exclusion	Osteoarthritis of knee, unspecified	Diagnosis	ICD-10	M17.9
Arthritis	Exclusion	Other polyosteoarthritis	Diagnosis	ICD-10	M15.8
Arthritis	Exclusion	Secondary multiple arthritis	Diagnosis	ICD-10	M15.3
Logic:	2 or more of any inclusion code on two separate dates in the absence of any exclusion code					** To be considered as having the Arthritis criteria, patients need to have 2 of the inclusions codes on at least 2 separate dates

## Sheet: ChronicCutaneous_SLICC.EULAR
Criteria	In/Ex-clusion	Name	Type	Terminiology	Code	Note
Chronic Cutaneous Lupus	Inclusion	Discoid lupus erythematosus of eyelid	Diagnosis	ICD9	373.34
Chronic Cutaneous Lupus	Inclusion	Panniculitis, unspecified sit	Diagnosis	ICD9	729.30
Chronic Cutaneous Lupus	Inclusion	Chilblains	Diagnosis	ICD9	991.5
Chronic Cutaneous Lupus	Inclusion	Lupus erythematosus	Diagnosis	ICD9	695.4
Chronic Cutaneous Lupus	Inclusion	Discoid lupus erythematosus of unspecified eye, unspecified eyelid	Diagnosis	ICD-10-CM	H01.129		d
Chronic Cutaneous Lupus	Inclusion	Panniculitis, unspecified	Diagnosis	ICD-10-CM	M79.3
Chronic Cutaneous Lupus	Inclusion	Chilblains, initial encounter	Diagnosis	ICD-10-CM	T69.1XXA
Chronic Cutaneous Lupus	Inclusion	Discoid lupus erythematosus	Diagnosis	ICD-10-CM	L93.0
Logic:	Two or more of the inclusion codes on at least 2 separate dates.

## Sheet: Delirium-Psychosis_EULAR
Criteria	In/Ex-clusion	Name	Type	Terminiology	Code	Note
Delirium/Psychosis	Inclusion	Other forms of epilepsy and recurrent seizures, without mention of intractable epilepsy	Diagnosis	ICD-9	345.80
Delirium/Psychosis	Inclusion	Petit mal status	Diagnosis	ICD-9	345.2
Delirium/Psychosis	Inclusion	Generalized convulsive epilepsy	Diagnosis	ICD-9	345.1
Delirium/Psychosis	Inclusion	Other causes of encephalitis and encephalomyelitis	Diagnosis	ICD-9	323.81
Delirium/Psychosis	Inclusion	Mononeuritis of unspecified site	Diagnosis	ICD-9	355.9
Delirium/Psychosis	Inclusion	Unspecified disorders of nervous system	Diagnosis	ICD-9	349.9
Delirium/Psychosis	Inclusion	Other causes of myelitis	Diagnosis	ICD-9	323.82
Delirium/Psychosis	Inclusion	Unspecified persistent mental disorders due to conditions classified elsewhere	Diagnosis	ICD-9	294.9
Delirium/Psychosis	Inclusion	Unspecified causes of encephalitis, myelitis, and encephalomyelitis	Diagnosis	ICD-9	323.9
Delirium/Psychosis	Inclusion	Epilepsy, unspecified, without mention of intractable epilepsy	Diagnosis	ICD-9	345.90
Delirium/Psychosis	Inclusion	Other forms of epilepsy and recurrent seizures, with intractable epilepsy	Diagnosis	ICD-9	345.81
Delirium/Psychosis	Inclusion	Osteopathy resulting from poliomyelitis, site unspecified	Diagnosis	ICD-9	730.70
Delirium/Psychosis	Inclusion	Unspecified diseases of blood and blood-forming organs	Diagnosis	ICD-9	289.9
Delirium/Psychosis	Inclusion	Delirium due to conditions classified elsewhere	Diagnosis	ICD-9	293.0
Delirium/Psychosis	Inclusion	Other convulsions	Diagnosis	ICD-9	780.39
Delirium/Psychosis	Inclusion	Unspecified psychosis	Diagnosis	ICD-9	298.9
Delirium/Psychosis	Inclusion	Epilepsy unspecified	Diagnosis	ICD-9	345.9
Delirium/Psychosis	Inclusion	Other specified idiopathic peripheral neuropathy	Diagnosis	ICD-9	356.8
Delirium/Psychosis	Inclusion	Localization_x001E_related (focal) (partial) epilepsy and epileptic syndromes with simple partial seizures	Diagnosis	ICD-9	345.50
Delirium/Psychosis	Inclusion	Unspecified transient mental disorder in conditions classified elsewhere	Diagnosis	ICD-9	293.9
Delirium/Psychosis	Inclusion	Localization-related (focal) (partial) epilepsy and epileptic syndromes with complex partial seizures, without mention of intractable epilepsy	Diagnosis	ICD-9	345.40
Delirium/Psychosis	Inclusion	Unspecified osteomyelitis, site unspecified	Diagnosis	ICD-9	730.20
Delirium/Psychosis	Inclusion	Epilepsy, unspecified, not intractable, without status epilepticus	Diagnosis	ICD-10	G40.909
Delirium/Psychosis	Inclusion	Delirium due to known physiological condition	Diagnosis	ICD-10	F05
Delirium/Psychosis	Inclusion	Generalized idiopathic epilepsy and epileptic syndromes, not intractable, with status epilepticus	Diagnosis	ICD-10	G40.301
Delirium/Psychosis	Inclusion	Epilepsy, unspecified, not intractable, with status epilepticus	Diagnosis	ICD-10	G40.901
Delirium/Psychosis	Inclusion	Unspecified psychosis not due to a substance or known physiological condition	Diagnosis	ICD-10	F29
Delirium/Psychosis	Inclusion	Unspecified convulsions	Diagnosis	ICD-10	R56.9
Delirium/Psychosis	Inclusion	Epilepsy, unspecified, intractable, with status epilepticus	Diagnosis	ICD-10	G40.911
Delirium/Psychosis	Inclusion	Other seizures	Diagnosis	ICD-10	G40.89
Delirium/Psychosis	Inclusion	Conversion disorder with seizures or convulsions	Diagnosis	ICD-10	F44.5
Delirium/Psychosis	Exclusion 1	Human immunodeficiency virus [HIV] disease	Diagnosis	ICD-9	042
Delirium/Psychosis	Exclusion 1	Unspecified infectious and parasitic diseases	Diagnosis	ICD-9	136.9
Delirium/Psychosis	Exclusion 1	Diabetes with neurological manifestations, type II or unspecified type, not stated as uncontrolled	Diagnosis	ICD-9	250.6
Delirium/Psychosis	Exclusion 1	Diabetes with neurological manifestations, type II or unspecified type, uncontrolled	Diagnosis	ICD-9	250.62
Delirium/Psychosis	Exclusion 1	Polyneuropathy in diabetes	Diagnosis	ICD-9	357.2
Delirium/Psychosis	Exclusion 1	Vascular disorders of skin	Diagnosis	ICD-9	709.1
Delirium/Psychosis	Exclusion 1	Other lymphedema	Diagnosis	ICD-9	457.1
Delirium/Psychosis	Exclusion 1	Human immunodeficiency virus [HIV] disease	Diagnosis	ICD-10	B20
Delirium/Psychosis	Exclusion 1	Unspecified parasitic disease	Diagnosis	ICD-10	B89
Delirium/Psychosis	Exclusion 1	Epilepsy, unspecified, not intractable, without status epilepticus	Diagnosis	ICD-10	B99.9
Delirium/Psychosis	Exclusion 1	Diabetes mellitus due to underlying condition with diabetic polyneuropathy	Diagnosis	ICD-10	E08.42
Delirium/Psychosis	Exclusion 1	Drug or chemical induced diabetes mellitus with neurological complications with diabetic polyneuropathy	Diagnosis	ICD-10	E09.42
Delirium/Psychosis	Exclusion 1	Type 1 diabetes mellitus with diabetic polyneuropathy	Diagnosis	ICD-10	E10.42
Delirium/Psychosis	Exclusion 1	Type 2 diabetes mellitus with diabetic neuropathy, unspecified	Diagnosis	ICD-10	E11.40
Delirium/Psychosis	Exclusion 1	Type 2 diabetes mellitus with diabetic polyneuropathy	Diagnosis	ICD-10	E11.42
Delirium/Psychosis	Exclusion 1	Other specified diabetes mellitus with diabetic polyneuropathy	Diagnosis	ICD-10	E13.42
Delirium/Psychosis	Exclusion 1	Lymphedema, not elsewhere classified	Diagnosis	ICD-10	I89.0
Delirium/Psychosis	Exclusion 1	Vasculitis limited to the skin, unspecified	Diagnosis	ICD-10	L95.9
Delirium/Psychosis	Exclusion 1	Acute disseminated encephalitis and encephalomyelitis, unspecified	Diagnosis	ICD-10	G04.00
Delirium/Psychosis	Exclusion 1	Postinfectious acute disseminated encephalitis and encephalomyelitis (postinfectious ADEM)	Diagnosis	ICD-10	G04.01
Delirium/Psychosis	Exclusion 1	Postimmunization acute disseminated encephalitis, myelitis and encephalomyelitis	Diagnosis	ICD-10	G04.02
Delirium/Psychosis	Exclusion 1	Bacterial meningoencephalitis and meningomyelitis, not elsewhere classified	Diagnosis	ICD-10	G04.2
Delirium/Psychosis	Exclusion 1	Acute necrotizing hemorrhagic encephalopathy, unspecified	Diagnosis	ICD-10	G04.30
Delirium/Psychosis	Exclusion 1	Postinfectious acute necrotizing hemorrhagic encephalopathy	Diagnosis	ICD-10	G04.31
Delirium/Psychosis	Exclusion 1	Postimmunization acute necrotizing hemorrhagic encephalopathy	Diagnosis	ICD-10	G04.32
Delirium/Psychosis	Exclusion 1	Other acute necrotizing hemorrhagic encephalopathy	Diagnosis	ICD-10	G04.39
Delirium/Psychosis	Exclusion 1	Toxic encephalopathy	Diagnosis	ICD-10	G92
Delirium/Psychosis	Exlusions 2	Other and unspecified injury to head face and neck	Diagnosis	ICD-9	959.*
Delirium/Psychosis	Exlusions 2	Other specified injuries of head, initial encounter	Diagnosis	ICD-10	S09.8XXA
Delirium/Psychosis	Exlusions 2	Unspecified injury of head, initial encounter	Diagnosis	ICD-10	S09.90XA
Delirium/Psychosis	Exlusions 2	Unspecified injury of face, initial encounter	Diagnosis	ICD-10	S09.93XA
Delirium/Psychosis	Exlusions 2	Unspecified injury of neck, initial encounter	Diagnosis	ICD-10	S19.9XXA
Delirium/Psychosis	Exlusions 2	Other specified injuries of thorax, initial encounter	Diagnosis	ICD-10	S29.8XXA
Delirium/Psychosis	Exlusions 2	Other specified injuries of abdomen, initial encounter	Diagnosis	ICD-10	S39.81XA
Delirium/Psychosis	Exlusions 2	Fracture of corpus cavernosum penis, initial encounter	Diagnosis	ICD-10	S39.840A
Delirium/Psychosis	Exlusions 2	Other specified injuries of external genitals, initial encounter	Diagnosis	ICD-10	S39.848A
Delirium/Psychosis	Exlusions 2	Other specified injuries of lower back, initial encounter	Diagnosis	ICD-10	S39.82XA
Delirium/Psychosis	Exlusions 2	Other specified injuries of shoulder and upper arm, unspecified arm, initial encounter	Diagnosis	ICD-10	S49.80XA
Delirium/Psychosis	Exlusions 2	Unspecified injury of shoulder and upper arm, unspecified arm, initial encounter	Diagnosis	ICD-10	S49.90XA
Delirium/Psychosis	Exlusions 2	Other specified injuries of unspecified elbow, initial encounter	Diagnosis	ICD-10	S59.809A
Delirium/Psychosis	Exlusions 2	Other specified injuries unspecified forearm, initial encounter	Diagnosis	ICD-10	S59.819A
Delirium/Psychosis	Exlusions 2	Unspecified injury of unspecified elbow, initial encounter	Diagnosis	ICD-10	S59.909A
Delirium/Psychosis	Exlusions 2	Unspecified injury of unspecified forearm, initial encounter	Diagnosis	ICD-10	S59.919A
Delirium/Psychosis	Exlusions 2	Unspecified injury of unspecified wrist, hand and finger(s), initial encounter	Diagnosis	ICD-10	S69.90XA
Delirium/Psychosis	Exlusions 2	Other specified injuries of unspecified hip, initial encounter	Diagnosis	ICD-10	S79.819A
Delirium/Psychosis	Exlusions 2	Other specified injuries of unspecified thigh, initial encounter	Diagnosis	ICD-10	S79.829A
Delirium/Psychosis	Exlusions 2	Unspecified injury of unspecified hip, initial encounter	Diagnosis	ICD-10	S79.919A
Delirium/Psychosis	Exlusions 2	Unspecified injury of unspecified thigh, initial encounter	Diagnosis	ICD-10	S79.929A
Delirium/Psychosis	Exlusions 2	Other specified injuries of unspecified lower leg, initial encounter	Diagnosis	ICD-10	S89.80XA
Delirium/Psychosis	Exlusions 2	Other specified injuries of unspecified ankle, initial encounter	Diagnosis	ICD-10	S99.819A
Delirium/Psychosis	Exlusions 2	Unspecified injury of unspecified ankle, initial encounter	Diagnosis	ICD-10	S99.919A
Delirium/Psychosis	Exlusions 2	Unspecified multiple injuries	Diagnosis	ICD-10	T07.XXXA
Delirium/Psychosis	Exlusions 2	Injury, unspecified	Diagnosis	ICD-10	T14.90XA
Logic: One or more codes from the Inclusion group, and not any codes from Exclusion Group 1 and not any codes from Exclusion Group 2 within 7 days of an Inclusion code

## Sheet: DirectCoombs_SLICC
Criteria	In/Ex-clusion	Name	Type	Terminiology	Code	Operator	Value	Units	Note
Direct Coombs	Inclusion	Direct antiglobulin test.poly specific reagent [Presence] on Red Blood Cells	Laboratory	LOINC	1007-4		Positive		Positive or similar
Direct Coombs	Inclusion	Direct antiglobulin test.IgG specific reagent [Interpretation] on Red Blood Cells	Laboratory	LOINC	1006-6		Positive		Positive or similar
Direct Coombs	Inclusion	Direct antiglobulin test.unspecified reagent [Presence] on Red Blood Cells	Laboratory	LOINC	51006-5		Positive		Positive or similar
Logic	Any Inclusion

[truncated: 20 more sheets: Discoid Rash_ACR, Fever_EULAR, Hematologic Disorder_ACR, HemolyticAnemia_SLICC.EULAR, Immunologic Disorder_ACR, Leukopenia_SLICC.EULAR, LowComplement_SLICC, LowComplementC3_EULAR, LowComplementC4_EULAR, Malar Rash_ACR, NeurologicalConditions_ACR, NeurologicalCondition_SLICC, OralUlcer_ALL, Photosensitivity_ACR , RenalDisease_ACR, RenalDisease_SLICC, RenalDisease_EULAR, Seizure_EULAR, Serositis_ALL, Thrombocytopenia_SLICC.EULAR]
